# Supplementary material for: Genetic Mutations Associated with Hormone-Positive Breast Cancer in Ethiopian Women
Source: bioRxiv or medRxiv preprint supplement (doi:10.1101/2020.11.25.20238881), 2020-11-30
Supplement: Supplementary file [file media-1.pdf]

| Ensembl ID     | geneName  | description                                                                                 |
|----------------|-----------|---------------------------------------------------------------------------------------------|
| ENSG0000188984 | AADACL3   | arylacetamide deacetylase like 3 [Source:HGNC Symbol;Acc:HGNC:32037]                        |
| ENSG0000198691 | ABCA4     | ATP binding cassette subfamily A member 4 [Source:HGNC Symbol;Acc:HGNC:34]                  |
| ENSG0000117528 | ABCD3     | ATP binding cassette subfamily D member 3 [Source:HGNC Symbol;Acc:HGNC:67]                  |
| ENSG0000117054 | ACADM     | acyl-CoA dehydrogenase medium chain [Source:HGNC Symbol;Acc:HGNC:89]                        |
| ENSG0000117054 | ACADM     | acyl-CoA dehydrogenase medium chain [Source:HGNC Symbol;Acc:HGNC:89]                        |
| ENSG0000162390 | ACOT11    | acyl-CoA thioesterase 11 [Source:HGNC Symbol;Acc:HGNC:18156]                                |
| ENSG0000097021 | ACOT7     | acyl-CoA thioesterase 7 [Source:HGNC Symbol;Acc:HGNC:24157]                                 |
| ENSG0000282608 | ADORA3    | adenosine A3 receptor [Source:HGNC Symbol;Acc:HGNC:268]                                     |
| ENSG0000186094 | AGBL4     | ATP/GTP binding protein like 4 [Source:HGNC Symbol;Acc:HGNC:25892]                          |
| ENSG0000186094 | AGBL4     | ATP/GTP binding protein like 4 [Source:HGNC Symbol;Acc:HGNC:25892]                          |
| ENSG0000186094 | AGBL4     | ATP/GTP binding protein like 4 [Source:HGNC Symbol;Acc:HGNC:25892]                          |
| ENSG0000186094 | AGBL4     | ATP/GTP binding protein like 4 [Source:HGNC Symbol;Acc:HGNC:25892]                          |
| ENSG0000186094 | AGBL4     | ATP/GTP binding protein like 4 [Source:HGNC Symbol;Acc:HGNC:25892]                          |
| ENSG0000186094 | AGBL4     | ATP/GTP binding protein like 4 [Source:HGNC Symbol;Acc:HGNC:25892]                          |
| ENSG0000186094 | AGBL4     | ATP/GTP binding protein like 4 [Source:HGNC Symbol;Acc:HGNC:25892]                          |
| ENSG0000186094 | AGBL4     | ATP/GTP binding protein like 4 [Source:HGNC Symbol;Acc:HGNC:25892]                          |
| ENSG0000186094 | AGBL4     | ATP/GTP binding protein like 4 [Source:HGNC Symbol;Acc:HGNC:25892]                          |
| ENSG0000186094 | AGBL4     | ATP/GTP binding protein like 4 [Source:HGNC Symbol;Acc:HGNC:25892]                          |
| ENSG0000186094 | AGBL4     | ATP/GTP binding protein like 4 [Source:HGNC Symbol;Acc:HGNC:25892]                          |
| ENSG0000162688 | AGL       | amylol-alpha-1, 6-glucosidase, 4-alpha-glucanotransferase [Source:HGNC Symbol;Acc:HGNC:321] |
| ENSG0000188157 | AGRN      | agrifin [Source:HGNC Symbol;Acc:HGNC:329]                                                   |
| ENSG0000188157 | AGRN      | agrifin [Source:HGNC Symbol;Acc:HGNC:329]                                                   |
| ENSG0000188157 | AGRN      | agrifin [Source:HGNC Symbol;Acc:HGNC:329]                                                   |
| ENSG0000188157 | AGRN      | agrifin [Source:HGNC Symbol;Acc:HGNC:329]                                                   |
| ENSG0000196581 | AJAP1     | adherens junctions associated protein 1 [Source:HGNC Symbol;Acc:HGNC:30801]                 |
| ENSG0000162433 | AK4       | adenylate kinase 4 [Source:HGNC Symbol;Acc:HGNC:363]                                        |
| ENSG0000154027 | AK5       | adenylate kinase 5 [Source:HGNC Symbol;Acc:HGNC:365]                                        |
| ENSG0000154027 | AK5       | adenylate kinase 5 [Source:HGNC Symbol;Acc:HGNC:365]                                        |
| ENSG0000154027 | AK5       | adenylate kinase 5 [Source:HGNC Symbol;Acc:HGNC:365]                                        |
| ENSG0000174574 | AKIRIN1   | akirin 1 [Source:HGNC Symbol;Acc:HGNC:25744]                                                |
| ENSG0000117448 | AKR1A1    | aldo-keto reductase family 1 member A1 [Source:HGNC Symbol;Acc:HGNC:380]                    |
| ENSG0000162482 | AKR7A3    | aldo-keto reductase family 7 member A3 [Source:HGNC Symbol;Acc:HGNC:390]                    |
| ENSG0000159423 | ALDH4A1   | aldehyde dehydrogenase 4 family member A1 [Source:HGNC Symbol;Acc:HGNC:406]                 |
| ENSG0000159423 | ALDH4A1   | aldehyde dehydrogenase 4 family member A1 [Source:HGNC Symbol;Acc:HGNC:406]                 |
| ENSG0000156150 | ALX3      | ALX homeobox 3 [Source:HGNC Symbol;Acc:HGNC:449]                                            |
| ENSG0000074964 | ARHGEF10L | Rho guanine nucleotide exchange factor 10 like [Source:HGNC Symbol;Acc:HGNC:25540]          |
| ENSG0000074964 | ARHGEF10L | Rho guanine nucleotide exchange factor 10 like [Source:HGNC Symbol;Acc:HGNC:25540]          |
| ENSG0000074964 | ARHGEF10L | Rho guanine nucleotide exchange factor 10 like [Source:HGNC Symbol;Acc:HGNC:25540]          |
| ENSG0000130762 | ARHGEF16  | Rho guanine nucleotide exchange factor 16 [Source:HGNC Symbol;Acc:HGNC:15515]               |
| ENSG0000088280 | ASAP3     | ArfGAP with SH3 domain, ankyrin repeat and PH domain 3 [Source:HGNC Symbol;Acc:HGNC:14987]  |
| ENSG0000088280 | ASAP3     | ArfGAP with SH3 domain, ankyrin repeat and PH domain 3 [Source:HGNC Symbol;Acc:HGNC:14987]  |
| ENSG0000160072 | ATAD3B    | ATPase family AAA domain containing 3B [Source:HGNC Symbol;Acc:HGNC:24007]                  |
| ENSG0000160072 | ATAD3B    | ATPase family AAA domain containing 3B [Source:HGNC Symbol;Acc:HGNC:24007]                  |
| ENSG0000125703 | ATG4C     | autophagy related 4C cysteine peptidase [Source:HGNC Symbol;Acc:HGNC:16040]                 |
| ENSG0000123472 | ATPAF1    | ATP synthase mitochondrial F1 complex assembly factor 1 [Source:HGNC Symbol;Acc:HGNC:18803] |
| ENSG0000123472 | ATPAF1    | ATP synthase mitochondrial F1 complex assembly factor 1 [Source:HGNC Symbol;Acc:HGNC:18803] |
| ENSG0000137936 | BCAR3     | BCAR3 adaptor protein, NSP family member [Source:HGNC Symbol;Acc:HGNC:973]                  |
| ENSG0000137936 | BCAR3     | BCAR3 adaptor protein, NSP family member [Source:HGNC Symbol;Acc:HGNC:973]                  |
| ENSG0000183682 | BMP8A     | bone morphogenetic protein 8a [Source:HGNC Symbol;Acc:HGNC:21650]                           |
| ENSG0000183682 | BMP8A     | bone morphogenetic protein 8a [Source:HGNC Symbol;Acc:HGNC:21650]                           |
| ENSG0000137948 | BRDT      | bromodomain testis associated [Source:HGNC Symbol;Acc:HGNC:1105]                            |
| None           | None      | None                                                                                        |
| None           | None      | None                                                                                        |
| None           | None      | None                                                                                        |
| ENSG0000162598 | C1orf87   | chromosome 1 open reading frame 87 [Source:HGNC Symbol;Acc:HGNC:28547]                      |
| ENSG0000158966 | CACHD1    | cache domain containing 1 [Source:HGNC Symbol;Acc:HGNC:29314]                               |
| ENSG0000158966 | CACHD1    | cache domain containing 1 [Source:HGNC Symbol;Acc:HGNC:29314]                               |
| ENSG0000171735 | CAMTA1    | calmodulin binding transcription activator 1 [Source:HGNC Symbol;Acc:HGNC:18806]            |
| ENSG0000171735 | CAMTA1    | calmodulin binding transcription activator 1 [Source:HGNC Symbol;Acc:HGNC:18806]            |
| ENSG0000171735 | CAMTA1    | calmodulin binding transcription activator 1 [Source:HGNC Symbol;Acc:HGNC:18806]            |
| ENSG0000171735 | CAMTA1    | calmodulin binding transcription activator 1 [Source:HGNC Symbol;Acc:HGNC:18806]            |
| ENSG0000171735 | CAMTA1    | calmodulin binding transcription activator 1 [Source:HGNC Symbol;Acc:HGNC:18806]            |
| ENSG0000171735 | CAMTA1    | calmodulin binding transcription activator 1 [Source:HGNC Symbol;Acc:HGNC:18806]            |
| ENSG0000171735 | CAMTA1    | calmodulin binding transcription activator 1 [Source:HGNC Symbol;Acc:HGNC:18806]            |
| ENSG0000171735 | CAMTA1    | calmodulin binding transcription activator 1 [Source:HGNC Symbol;Acc:HGNC:18806]            |
| ENSG0000171735 | CAMTA1    | calmodulin binding transcription activator 1 [Source:HGNC Symbol;Acc:HGNC:18806]            |
| ENSG0000171735 | CAMTA1    | calmodulin binding transcription activator 1 [Source:HGNC Symbol;Acc:HGNC:18806]            |
| ENSG0000116489 | CAPZA1    | capping actin protein of muscle Z-line subunit alpha 1 [Source:HGNC Symbol;Acc:HGNC:1488]   |
| ENSG0000077549 | CAPZB     | capping actin protein of muscle Z-line subunit beta [Source:HGNC Symbol;Acc:HGNC:1491]      |
| ENSG0000132906 | CASP9     | caspase 9 [Source:HGNC Symbol;Acc:HGNC:1511]                                                |
| ENSG0000118729 | CASQ2     | calsequestrin 2 [Source:HGNC Symbol;Acc:HGNC:1513]                                          |
| ENSG0000130940 | CASZ1     | castor zinc finger 1 [Source:HGNC Symbol;Acc:HGNC:26002]                                    |
| ENSG0000130940 | CASZ1     | castor zinc finger 1 [Source:HGNC Symbol;Acc:HGNC:26002]                                    |
| ENSG0000188782 | CATSPER4  | cation channel sperm associated 4 [Source:HGNC Symbol;Acc:HGNC:23220]                       |
| ENSG0000122483 | CCDC18    | coiled-coil domain containing 18 [Source:HGNC Symbol;Acc:HGNC:30370]                        |
| ENSG0000122483 | CCDC18    | coiled-coil domain containing 18 [Source:HGNC Symbol;Acc:HGNC:30370]                        |
| ENSG0000122483 | CCDC18    | coiled-coil domain containing 18 [Source:HGNC Symbol;Acc:HGNC:30370]                        |
| ENSG0000122483 | CCDC18    | coiled-coil domain containing 18 [Source:HGNC Symbol;Acc:HGNC:30370]                        |
| ENSG0000162592 | CCDC27    | coiled-coil domain containing 27 [Source:HGNC Symbol;Acc:HGNC:26546]                        |

|                 |           |                                                                                               |
|-----------------|-----------|-----------------------------------------------------------------------------------------------|
| ENSG00000186409 | CCDC30    | coiled-coil domain containing 30 [Source:HGNC Symbol;Acc:HGNC:26103]                          |
| ENSG00000186409 | CCDC30    | coiled-coil domain containing 30 [Source:HGNC Symbol;Acc:HGNC:26103]                          |
| ENSG00000079335 | CDC14A    | cell division cycle 14A [Source:HGNC Symbol;Acc:HGNC:1718]                                    |
| ENSG00000157211 | CDCP2     | CUB domain containing protein 2 [Source:HGNC Symbol;Acc:HGNC:27297]                           |
| ENSG00000157211 | CDCP2     | CUB domain containing protein 2 [Source:HGNC Symbol;Acc:HGNC:27297]                           |
| None            | None      | None                                                                                          |
| None            | None      | None                                                                                          |
| ENSG00000248333 | CDK11B    | cyclin dependent kinase 11B [Source:HGNC Symbol;Acc:HGNC:1729]                                |
| ENSG00000142615 | CELA2A    | chymotrypsin like elastase 2A [Source:HGNC Symbol;Acc:HGNC:24609]                             |
| ENSG00000215704 | CELA2B    | chymotrypsin like elastase 2B [Source:HGNC Symbol;Acc:HGNC:29995]                             |
| ENSG00000219073 | CELA3B    | chymotrypsin like elastase 3B [Source:HGNC Symbol;Acc:HGNC:15945]                             |
| ENSG00000219073 | CELA3B    | chymotrypsin like elastase 3B [Source:HGNC Symbol;Acc:HGNC:15945]                             |
| ENSG00000116198 | CEP104    | centrosomal protein 104 [Source:HGNC Symbol;Acc:HGNC:24866]                                   |
| ENSG00000116198 | CEP104    | centrosomal protein 104 [Source:HGNC Symbol;Acc:HGNC:24866]                                   |
| ENSG00000130695 | CEP85     | centrosomal protein 85 [Source:HGNC Symbol;Acc:HGNC:25309]                                    |
| ENSG0000016490  | CLCA1     | chloride channel accessory 1 [Source:HGNC Symbol;Acc:HGNC:2015]                               |
| ENSG00000011021 | CLCN6     | chloride voltage-gated channel 6 [Source:HGNC Symbol;Acc:HGNC:2024]                           |
| ENSG00000011021 | CLCN6     | chloride voltage-gated channel 6 [Source:HGNC Symbol;Acc:HGNC:2024]                           |
| ENSG00000186510 | CLCNKA    | chloride voltage-gated channel Ka [Source:HGNC Symbol;Acc:HGNC:2026]                          |
| ENSG00000092853 | CLSPN     | claspin [Source:HGNC Symbol;Acc:HGNC:19715]                                                   |
| ENSG00000188822 | CNR2      | cannabinoid receptor 2 [Source:HGNC Symbol;Acc:HGNC:2160]                                     |
| ENSG00000060718 | COL11A1   | collagen type XI alpha 1 chain [Source:HGNC Symbol;Acc:HGNC:2186]                             |
| ENSG00000060718 | COL11A1   | collagen type XI alpha 1 chain [Source:HGNC Symbol;Acc:HGNC:2186]                             |
| ENSG00000060718 | COL11A1   | collagen type XI alpha 1 chain [Source:HGNC Symbol;Acc:HGNC:2186]                             |
| ENSG00000060718 | COL11A1   | collagen type XI alpha 1 chain [Source:HGNC Symbol;Acc:HGNC:2186]                             |
| ENSG00000084636 | COL16A1   | collagen type XVI alpha 1 chain [Source:HGNC Symbol;Acc:HGNC:2193]                            |
| ENSG00000171502 | COL24A1   | collagen type XXIV alpha 1 chain [Source:HGNC Symbol;Acc:HGNC:20821]                          |
| ENSG00000171502 | COL24A1   | collagen type XXIV alpha 1 chain [Source:HGNC Symbol;Acc:HGNC:20821]                          |
| ENSG00000171502 | COL24A1   | collagen type XXIV alpha 1 chain [Source:HGNC Symbol;Acc:HGNC:20821]                          |
| ENSG00000058453 | CROCC     | ciliary rootlet coiled-coil, rootletin [Source:HGNC Symbol;Acc:HGNC:21299]                    |
| ENSG00000058453 | CROCC     | ciliary rootlet coiled-coil, rootletin [Source:HGNC Symbol;Acc:HGNC:21299]                    |
| ENSG00000058453 | CROCC     | ciliary rootlet coiled-coil, rootletin [Source:HGNC Symbol;Acc:HGNC:21299]                    |
| ENSG00000215908 | CROCCP2   | CROCC pseudogene 2 [Source:HGNC Symbol;Acc:HGNC:28170]                                        |
| ENSG00000215908 | CROCCP2   | CROCC pseudogene 2 [Source:HGNC Symbol;Acc:HGNC:28170]                                        |
| ENSG00000215908 | CROCCP2   | CROCC pseudogene 2 [Source:HGNC Symbol;Acc:HGNC:28170]                                        |
| ENSG00000215908 | CROCCP2   | CROCC pseudogene 2 [Source:HGNC Symbol;Acc:HGNC:28170]                                        |
| ENSG00000080947 | CROCCP3   | CROCC pseudogene 3 [Source:HGNC Symbol;Acc:HGNC:29405]                                        |
| ENSG00000121904 | CSMD2     | CUB and Sushi multiple domains 2 [Source:HGNC Symbol;Acc:HGNC:19290]                          |
| ENSG00000121904 | CSMD2     | CUB and Sushi multiple domains 2 [Source:HGNC Symbol;Acc:HGNC:19290]                          |
| ENSG00000121904 | CSMD2     | CUB and Sushi multiple domains 2 [Source:HGNC Symbol;Acc:HGNC:19290]                          |
| ENSG00000121904 | CSMD2     | CUB and Sushi multiple domains 2 [Source:HGNC Symbol;Acc:HGNC:19290]                          |
| ENSG00000121904 | CSMD2     | CUB and Sushi multiple domains 2 [Source:HGNC Symbol;Acc:HGNC:19290]                          |
| ENSG00000121904 | CSMD2     | CUB and Sushi multiple domains 2 [Source:HGNC Symbol;Acc:HGNC:19290]                          |
| ENSG00000143079 | CTTNBP2NL | CTTNBP2 N-terminal like [Source:HGNC Symbol;Acc:HGNC:25330]                                   |
| ENSG00000143079 | CTTNBP2NL | CTTNBP2 N-terminal like [Source:HGNC Symbol;Acc:HGNC:25330]                                   |
| ENSG00000143079 | CTTNBP2NL | CTTNBP2 N-terminal like [Source:HGNC Symbol;Acc:HGNC:25330]                                   |
| ENSG00000174151 | CYB561D1  | cytochrome b561 family member D1 [Source:HGNC Symbol;Acc:HGNC:26804]                          |
| ENSG00000154198 | CYP4Z2P   | cytochrome P450 family 4 subfamily Z member 2, pseudogene [Source:HGNC Symbol;Acc:HGNC:24426] |
| ENSG00000173406 | DAB1      | DAB adaptor protein 1 [Source:HGNC Symbol;Acc:HGNC:2661]                                      |
| ENSG00000173406 | DAB1      | DAB adaptor protein 1 [Source:HGNC Symbol;Acc:HGNC:2661]                                      |
| ENSG00000173406 | DAB1      | DAB adaptor protein 1 [Source:HGNC Symbol;Acc:HGNC:2661]                                      |
| ENSG00000173406 | DAB1      | DAB adaptor protein 1 [Source:HGNC Symbol;Acc:HGNC:2661]                                      |
| ENSG00000173406 | DAB1      | DAB adaptor protein 1 [Source:HGNC Symbol;Acc:HGNC:2661]                                      |
| ENSG00000173406 | DAB1      | DAB adaptor protein 1 [Source:HGNC Symbol;Acc:HGNC:2661]                                      |
| ENSG00000173406 | DAB1      | DAB adaptor protein 1 [Source:HGNC Symbol;Acc:HGNC:2661]                                      |
| ENSG00000173406 | DAB1      | DAB adaptor protein 1 [Source:HGNC Symbol;Acc:HGNC:2661]                                      |
| ENSG00000173406 | DAB1      | DAB adaptor protein 1 [Source:HGNC Symbol;Acc:HGNC:2661]                                      |
| ENSG00000173406 | DAB1      | DAB adaptor protein 1 [Source:HGNC Symbol;Acc:HGNC:2661]                                      |
| ENSG00000173406 | DAB1      | DAB adaptor protein 1 [Source:HGNC Symbol;Acc:HGNC:2661]                                      |
| ENSG00000153904 | DDAH1     | dimethylarginine dimethylaminohydrolase 1 [Source:HGNC Symbol;Acc:HGNC:2715]                  |
| ENSG00000153904 | DDAH1     | dimethylarginine dimethylaminohydrolase 1 [Source:HGNC Symbol;Acc:HGNC:2715]                  |
| ENSG00000153904 | DDAH1     | dimethylarginine dimethylaminohydrolase 1 [Source:HGNC Symbol;Acc:HGNC:2715]                  |
| ENSG00000153904 | DDAH1     | dimethylarginine dimethylaminohydrolase 1 [Source:HGNC Symbol;Acc:HGNC:2715]                  |
| ENSG00000197312 | DDI2      | DNA damage inducible 1 homolog 2 [Source:HGNC Symbol;Acc:HGNC:24578]                          |
| ENSG00000175984 | DENND2C   | DENN domain containing 2C [Source:HGNC Symbol;Acc:HGNC:24748]                                 |
| ENSG00000175984 | DENND2C   | DENN domain containing 2C [Source:HGNC Symbol;Acc:HGNC:24748]                                 |
| ENSG00000169598 | DFFB      | DNA fragmentation factor subunit beta [Source:HGNC Symbol;Acc:HGNC:2773]                      |
| ENSG00000169598 | DFFB      | DNA fragmentation factor subunit beta [Source:HGNC Symbol;Acc:HGNC:2773]                      |
| ENSG00000169598 | DFFB      | DNA fragmentation factor subunit beta [Source:HGNC Symbol;Acc:HGNC:2773]                      |
| ENSG00000161333 | DHCR24    | 24-dehydrocholesterol reductase [Source:HGNC Symbol;Acc:HGNC:2859]                            |
| ENSG00000007923 | DNAJC11   | DnaJ heat shock protein family (Hsp40) member C11 [Source:HGNC Symbol;Acc:HGNC:25570]         |
| ENSG00000116675 | DNAJC6    | DnaJ heat shock protein family (Hsp40) member C6 [Source:HGNC Symbol;Acc:HGNC:15469]          |
| ENSG00000116675 | DNAJC6    | DnaJ heat shock protein family (Hsp40) member C6 [Source:HGNC Symbol;Acc:HGNC:15469]          |
| ENSG00000116675 | DNAJC6    | DnaJ heat shock protein family (Hsp40) member C6 [Source:HGNC Symbol;Acc:HGNC:15469]          |
| ENSG00000116675 | DNAJC6    | DnaJ heat shock protein family (Hsp40) member C6 [Source:HGNC Symbol;Acc:HGNC:15469]          |
| ENSG00000116675 | DNAJC6    | DnaJ heat shock protein family (Hsp40) member C6 [Source:HGNC Symbol;Acc:HGNC:15469]          |

|                 |           |                                                                                              |
|-----------------|-----------|----------------------------------------------------------------------------------------------|
| ENSG00000116641 | DOCK7     | dedicator of cytokinesis 7 [Source:HGNC Symbol;Acc:HGNC:19190]                               |
| ENSG00000116641 | DOCK7     | dedicator of cytokinesis 7 [Source:HGNC Symbol;Acc:HGNC:19190]                               |
| ENSG00000116641 | DOCK7     | dedicator of cytokinesis 7 [Source:HGNC Symbol;Acc:HGNC:19190]                               |
| ENSG00000188641 | DPYD      | dihydropyrimidine dehydrogenase [Source:HGNC Symbol;Acc:HGNC:3012]                           |
| ENSG00000232878 | DPYD-AS1  | DPYD antisense RNA 1 [Source:HGNC Symbol;Acc:HGNC:40195]                                     |
| ENSG00000232878 | DPYD-AS1  | DPYD antisense RNA 1 [Source:HGNC Symbol;Acc:HGNC:40195]                                     |
| ENSG00000117298 | ECE1      | endothelin converting enzyme 1 [Source:HGNC Symbol;Acc:HGNC:3146]                            |
| ENSG00000203965 | EFCAB7    | EF-hand calcium binding domain 7 [Source:HGNC Symbol;Acc:HGNC:29379]                         |
| ENSG00000142634 | EFHD2     | EF-hand domain family member D2 [Source:HGNC Symbol;Acc:HGNC:28670]                          |
| ENSG00000070785 | EIF2B3    | eukaryotic translation initiation factor 2B subunit gamma [Source:HGNC Symbol;Acc:HGNC:3259] |
| ENSG00000075151 | EIF4G3    | eukaryotic translation initiation factor 4 gamma 3 [Source:HGNC Symbol;Acc:HGNC:3298]        |
| ENSG00000075151 | EIF4G3    | eukaryotic translation initiation factor 4 gamma 3 [Source:HGNC Symbol;Acc:HGNC:3298]        |
| ENSG00000075151 | EIF4G3    | eukaryotic translation initiation factor 4 gamma 3 [Source:HGNC Symbol;Acc:HGNC:3298]        |
| ENSG00000075151 | EIF4G3    | eukaryotic translation initiation factor 4 gamma 3 [Source:HGNC Symbol;Acc:HGNC:3298]        |
| None            | None      | None                                                                                         |
| None            | None      | None                                                                                         |
| ENSG00000159023 | EPBA1     | erythrocyte membrane protein band 4.1 [Source:HGNC Symbol;Acc:HGNC:3377]                     |
| ENSG00000183317 | EPHA10    | EPH receptor A10 [Source:HGNC Symbol;Acc:HGNC:19987]                                         |
| ENSG00000070886 | EPHA8     | EPH receptor A8 [Source:HGNC Symbol;Acc:HGNC:3391]                                           |
| ENSG00000070886 | EPHA8     | EPH receptor A8 [Source:HGNC Symbol;Acc:HGNC:3391]                                           |
| ENSG00000133216 | EPHB2     | EPH receptor B2 [Source:HGNC Symbol;Acc:HGNC:3393]                                           |
| ENSG00000198758 | EPS8L3    | EPS8 like 3 [Source:HGNC Symbol;Acc:HGNC:21297]                                              |
| ENSG00000117419 | ERI3      | ERI1 exoribonuclease family member 3 [Source:HGNC Symbol;Acc:HGNC:17276]                     |
| ENSG00000268869 | ESPNP     | espin pseudogene [Source:HGNC Symbol;Acc:HGNC:23285]                                         |
| ENSG00000268869 | ESPNP     | espin pseudogene [Source:HGNC Symbol;Acc:HGNC:23285]                                         |
| ENSG00000268869 | ESPNP     | espin pseudogene [Source:HGNC Symbol;Acc:HGNC:23285]                                         |
| ENSG00000067208 | EVI5      | ecotropic viral integration site 5 [Source:HGNC Symbol;Acc:HGNC:3501]                        |
| ENSG00000067208 | EVI5      | ecotropic viral integration site 5 [Source:HGNC Symbol;Acc:HGNC:3501]                        |
| ENSG00000067208 | EVI5      | ecotropic viral integration site 5 [Source:HGNC Symbol;Acc:HGNC:3501]                        |
| ENSG00000067208 | EVI5      | ecotropic viral integration site 5 [Source:HGNC Symbol;Acc:HGNC:3501]                        |
| ENSG00000185104 | FAF1      | Fas associated factor 1 [Source:HGNC Symbol;Acc:HGNC:3578]                                   |
| ENSG00000185104 | FAF1      | Fas associated factor 1 [Source:HGNC Symbol;Acc:HGNC:3578]                                   |
| ENSG00000185104 | FAF1      | Fas associated factor 1 [Source:HGNC Symbol;Acc:HGNC:3578]                                   |
| ENSG00000172456 | FGGY      | FGGY carbohydrate kinase domain containing [Source:HGNC Symbol;Acc:HGNC:25610]               |
| ENSG00000172456 | FGGY      | FGGY carbohydrate kinase domain containing [Source:HGNC Symbol;Acc:HGNC:25610]               |
| ENSG00000142621 | FHAD1     | forkhead associated phosphopeptide binding domain 1 [Source:HGNC Symbol;Acc:HGNC:29408]      |
| ENSG00000142621 | FHAD1     | forkhead associated phosphopeptide binding domain 1 [Source:HGNC Symbol;Acc:HGNC:29408]      |
| ENSG00000142621 | FHAD1     | forkhead associated phosphopeptide binding domain 1 [Source:HGNC Symbol;Acc:HGNC:29408]      |
| ENSG00000142621 | FHAD1     | forkhead associated phosphopeptide binding domain 1 [Source:HGNC Symbol;Acc:HGNC:29408]      |
| ENSG00000198815 | FOXJ3     | forkhead box J3 [Source:HGNC Symbol;Acc:HGNC:29178]                                          |
| ENSG00000198815 | FOXJ3     | forkhead box J3 [Source:HGNC Symbol;Acc:HGNC:29178]                                          |
| None            | None      | None                                                                                         |
| None            | None      | None                                                                                         |
| None            | None      | None                                                                                         |
| None            | None      | None                                                                                         |
| ENSG00000156869 | FRRS1     | ferric chelate reductase 1 [Source:HGNC Symbol;Acc:HGNC:27622]                               |
| ENSG00000183347 | GBP6      | guanylate binding protein family member 6 [Source:HGNC Symbol;Acc:HGNC:25395]                |
| ENSG00000213512 | GBP7      | guanylate binding protein 7 [Source:HGNC Symbol;Acc:HGNC:29606]                              |
| ENSG00000137960 | GIPC2     | GIPC PDZ domain containing family member 2 [Source:HGNC Symbol;Acc:HGNC:18177]               |
| ENSG00000174332 | GLIS1     | GLIS family zinc finger 1 [Source:HGNC Symbol;Acc:HGNC:29525]                                |
| ENSG00000174332 | GLIS1     | GLIS family zinc finger 1 [Source:HGNC Symbol;Acc:HGNC:29525]                                |
| ENSG00000174332 | GLIS1     | GLIS family zinc finger 1 [Source:HGNC Symbol;Acc:HGNC:29525]                                |
| ENSG00000174332 | GLIS1     | GLIS family zinc finger 1 [Source:HGNC Symbol;Acc:HGNC:29525]                                |
| ENSG00000174332 | GLIS1     | GLIS family zinc finger 1 [Source:HGNC Symbol;Acc:HGNC:29525]                                |
| ENSG00000078369 | GNB1      | G protein subunit beta 1 [Source:HGNC Symbol;Acc:HGNC:4396]                                  |
| ENSG00000172380 | GNG12     | G protein subunit gamma 12 [Source:HGNC Symbol;Acc:HGNC:19663]                               |
| ENSG00000232284 | GNG12-AS1 | GNG12, DIRAS3 and WLS antisense RNA 1 [Source:HGNC Symbol;Acc:HGNC:43938]                    |
| ENSG00000232284 | GNG12-AS1 | GNG12, DIRAS3 and WLS antisense RNA 1 [Source:HGNC Symbol;Acc:HGNC:43938]                    |
| ENSG00000232284 | GNG12-AS1 | GNG12, DIRAS3 and WLS antisense RNA 1 [Source:HGNC Symbol;Acc:HGNC:43938]                    |
| ENSG00000159592 | GPBP1L1   | GC-rich promoter binding protein 1 like 1 [Source:HGNC Symbol;Acc:HGNC:28843]                |
| ENSG00000158055 | GRHL3     | grainyhead like transcription factor 3 [Source:HGNC Symbol;Acc:HGNC:25839]                   |
| ENSG00000163873 | GRIK3     | glutamate ionotropic receptor kainate type subunit 3 [Source:HGNC Symbol;Acc:HGNC:4581]      |
| ENSG00000163873 | GRIK3     | glutamate ionotropic receptor kainate type subunit 3 [Source:HGNC Symbol;Acc:HGNC:4581]      |
| ENSG00000162669 | HFM1      | helicase for meiosis 1 [Source:HGNC Symbol;Acc:HGNC:20193]                                   |
| ENSG00000162669 | HFM1      | helicase for meiosis 1 [Source:HGNC Symbol;Acc:HGNC:20193]                                   |
| ENSG00000162669 | HFM1      | helicase for meiosis 1 [Source:HGNC Symbol;Acc:HGNC:20193]                                   |
| ENSG00000127124 | HIVEP3    | HIVEP zinc finger 3 [Source:HGNC Symbol;Acc:HGNC:13561]                                      |
| ENSG00000127124 | HIVEP3    | HIVEP zinc finger 3 [Source:HGNC Symbol;Acc:HGNC:13561]                                      |
| ENSG00000127124 | HIVEP3    | HIVEP zinc finger 3 [Source:HGNC Symbol;Acc:HGNC:13561]                                      |
| ENSG00000127124 | HIVEP3    | HIVEP zinc finger 3 [Source:HGNC Symbol;Acc:HGNC:13561]                                      |
| ENSG00000127124 | HIVEP3    | HIVEP zinc finger 3 [Source:HGNC Symbol;Acc:HGNC:13561]                                      |
| ENSG00000153936 | H52ST1    | heparan sulfate 2-O-sulfotransferase 1 [Source:HGNC Symbol;Acc:HGNC:5193]                    |
| ENSG00000153936 | H52ST1    | heparan sulfate 2-O-sulfotransferase 1 [Source:HGNC Symbol;Acc:HGNC:5193]                    |
| ENSG00000136720 | H56ST1    | heparan sulfate 6-O-sulfotransferase 1 [Source:HGNC Symbol;Acc:HGNC:5201]                    |
| ENSG00000136720 | H56ST1    | heparan sulfate 6-O-sulfotransferase 1 [Source:HGNC Symbol;Acc:HGNC:5201]                    |
| ENSG00000136720 | H56ST1    | heparan sulfate 6-O-sulfotransferase 1 [Source:HGNC Symbol;Acc:HGNC:5201]                    |





|                 |         |                                                                                              |
|-----------------|---------|----------------------------------------------------------------------------------------------|
| ENSG0000057468  | MSH4    | mutS homolog 4 [Source:HGNC Symbol;Acc:HGNC:7327]                                            |
| ENSG0000173531  | MST1    | macrophage stimulating 1 [Source:HGNC Symbol;Acc:HGNC:7380]                                  |
| ENSG0000188786  | MTF1    | metal regulatory transcription factor 1 [Source:HGNC Symbol;Acc:HGNC:7428]                   |
| ENSG0000117640  | MTRF1L  | mitochondrial fission regulator 1 like [Source:HGNC Symbol;Acc:HGNC:28836]                   |
| ENSG0000162576  | MXRA8   | matrix remodeling associated 8 [Source:HGNC Symbol;Acc:HGNC:7542]                            |
| ENSG0000162601  | MYSM1   | Myb like, SWIRM and MPN domains 1 [Source:HGNC Symbol;Acc:HGNC:29401]                        |
| ENSG0000162601  | MYSM1   | Myb like, SWIRM and MPN domains 1 [Source:HGNC Symbol;Acc:HGNC:29401]                        |
| ENSG0000008130  | NADK    | NAD kinase [Source:HGNC Symbol;Acc:HGNC:29831]                                               |
| ENSG0000132780  | NASP    | nuclear autoantigenic sperm protein [Source:HGNC Symbol;Acc:HGNC:7644]                       |
| ENSG0000219481  | NBPF1   | NBPF member 1 [Source:HGNC Symbol;Acc:HGNC:26088]                                            |
| ENSG0000219481  | NBPF1   | NBPF member 1 [Source:HGNC Symbol;Acc:HGNC:26088]                                            |
| ENSG0000219481  | NBPF1   | NBPF member 1 [Source:HGNC Symbol;Acc:HGNC:26088]                                            |
| ENSG0000142794  | NBPF3   | NBPF member 3 [Source:HGNC Symbol;Acc:HGNC:25076]                                            |
| ENSG0000142794  | NBPF3   | NBPF member 3 [Source:HGNC Symbol;Acc:HGNC:25076]                                            |
| ENSG0000270231  | NBPF8   | NBPF member 8 [Source:HGNC Symbol;Acc:HGNC:31990]                                            |
| ENSG0000270231  | NBPF8   | NBPF member 8 [Source:HGNC Symbol;Acc:HGNC:31990]                                            |
| ENSG0000270231  | NBPF8   | NBPF member 8 [Source:HGNC Symbol;Acc:HGNC:31990]                                            |
| ENSG0000184454  | NCMAP   | non-compact myelin associated protein [Source:HGNC Symbol;Acc:HGNC:29332]                    |
| ENSG0000184454  | NCMAP   | non-compact myelin associated protein [Source:HGNC Symbol;Acc:HGNC:29332]                    |
| ENSG0000172260  | NEGR1   | neuronal growth regulator 1 [Source:HGNC Symbol;Acc:HGNC:17302]                              |
| ENSG0000172260  | NEGR1   | neuronal growth regulator 1 [Source:HGNC Symbol;Acc:HGNC:17302]                              |
| ENSG0000172260  | NEGR1   | neuronal growth regulator 1 [Source:HGNC Symbol;Acc:HGNC:17302]                              |
| ENSG0000172260  | NEGR1   | neuronal growth regulator 1 [Source:HGNC Symbol;Acc:HGNC:17302]                              |
| ENSG0000172260  | NEGR1   | neuronal growth regulator 1 [Source:HGNC Symbol;Acc:HGNC:17302]                              |
| ENSG0000162599  | NFIA    | nuclear factor I A [Source:HGNC Symbol;Acc:HGNC:7784]                                        |
| ENSG0000162599  | NFIA    | nuclear factor I A [Source:HGNC Symbol;Acc:HGNC:7784]                                        |
| ENSG0000066136  | NYFC    | nuclear transcription factor Y subunit gamma [Source:HGNC Symbol;Acc:HGNC:7806]              |
| ENSG0000001461  | NIPAL3  | NIPA like domain containing 3 [Source:HGNC Symbol;Acc:HGNC:25233]                            |
| ENSG0000001461  | NIPAL3  | NIPA like domain containing 3 [Source:HGNC Symbol;Acc:HGNC:25233]                            |
| ENSG0000123213  | NLN     | neurolysin [Source:HGNC Symbol;Acc:HGNC:16058]                                               |
| ENSG0000188976  | NOC2L   | NOC2 like nucleolar associated transcriptional repressor [Source:HGNC Symbol;Acc:HGNC:24517] |
| ENSG0000162408  | NOL9    | nucleolar protein 9 [Source:HGNC Symbol;Acc:HGNC:26265]                                      |
| ENSG0000162408  | NOL9    | nucleolar protein 9 [Source:HGNC Symbol;Acc:HGNC:26265]                                      |
| None            | None    | None                                                                                         |
| None            | None    | None                                                                                         |
| ENSG0000134250  | NOTCH2  | notch receptor 2 [Source:HGNC Symbol;Acc:HGNC:7882]                                          |
| ENSG0000134250  | NOTCH2  | notch receptor 2 [Source:HGNC Symbol;Acc:HGNC:7882]                                          |
| ENSG0000131697  | NPHP4   | nephrocystin 4 [Source:HGNC Symbol;Acc:HGNC:19104]                                           |
| ENSG0000131697  | NPHP4   | nephrocystin 4 [Source:HGNC Symbol;Acc:HGNC:19104]                                           |
| ENSG0000162631  | NTNG1   | netrin G1 [Source:HGNC Symbol;Acc:HGNC:23319]                                                |
| ENSG0000118733  | OLFM3   | olfactomedin 3 [Source:HGNC Symbol;Acc:HGNC:17990]                                           |
| ENSG0000142623  | PADI1   | peptidyl arginine deiminase 1 [Source:HGNC Symbol;Acc:HGNC:18367]                            |
| ENSG0000117115  | PADI2   | peptidyl arginine deiminase 2 [Source:HGNC Symbol;Acc:HGNC:18341]                            |
| ENSG0000117115  | PADI2   | peptidyl arginine deiminase 2 [Source:HGNC Symbol;Acc:HGNC:18341]                            |
| ENSG0000117115  | PADI2   | peptidyl arginine deiminase 2 [Source:HGNC Symbol;Acc:HGNC:18341]                            |
| ENSG0000117115  | PADI2   | peptidyl arginine deiminase 2 [Source:HGNC Symbol;Acc:HGNC:18341]                            |
| ENSG0000142619  | PADI3   | peptidyl arginine deiminase 3 [Source:HGNC Symbol;Acc:HGNC:18337]                            |
| ENSG0000276747  | PADI6   | peptidyl arginine deiminase 6 [Source:HGNC Symbol;Acc:HGNC:20449]                            |
| ENSG0000276747  | PADI6   | peptidyl arginine deiminase 6 [Source:HGNC Symbol;Acc:HGNC:20449]                            |
| ENSG0000276747  | PADI6   | peptidyl arginine deiminase 6 [Source:HGNC Symbol;Acc:HGNC:20449]                            |
| ENSG0000009709  | PAX7    | paired box 7 [Source:HGNC Symbol;Acc:HGNC:8621]                                              |
| ENSG0000184588  | PDE4B   | phosphodiesterase 4B [Source:HGNC Symbol;Acc:HGNC:8781]                                      |
| ENSG0000184588  | PDE4B   | phosphodiesterase 4B [Source:HGNC Symbol;Acc:HGNC:8781]                                      |
| ENSG0000179889  | PDXDC1  | pyridoxal dependent decarboxylase domain containing 1 [Source:HGNC Symbol;Acc:HGNC:28995]    |
| ENSG0000049246  | PER3    | period circadian regulator 3 [Source:HGNC Symbol;Acc:HGNC:8847]                              |
| ENSG0000142655  | PEX14   | peroxisomal biogenesis factor 14 [Source:HGNC Symbol;Acc:HGNC:8856]                          |
| ENSG0000142655  | PEX14   | peroxisomal biogenesis factor 14 [Source:HGNC Symbol;Acc:HGNC:8856]                          |
| ENSG0000204138  | PHACTR4 | phosphatase and actin regulator 4 [Source:HGNC Symbol;Acc:HGNC:25793]                        |
| ENSG0000134686  | PHC2    | polyhomeotic homolog 2 [Source:HGNC Symbol;Acc:HGNC:3183]                                    |
| ENSG0000134686  | PHC2    | polyhomeotic homolog 2 [Source:HGNC Symbol;Acc:HGNC:3183]                                    |
| ENSG0000116793  | PHTF1   | putative homeodomain transcription factor 1 [Source:HGNC Symbol;Acc:HGNC:8939]               |
| ENSG0000065243  | PKN2    | protein kinase N2 [Source:HGNC Symbol;Acc:HGNC:9406]                                         |
| ENSG0000149527  | PLCH2   | phospholipase C eta 2 [Source:HGNC Symbol;Acc:HGNC:29037]                                    |
| ENSG0000171680  | PLEKHG5 | pleckstrin homology and RhoGEF domain containing G5 [Source:HGNC Symbol;Acc:HGNC:29105]      |
| None            | None    | None                                                                                         |
| None            | None    | None                                                                                         |
| ENSG00000040487 | SLC66A1 | solute carrier family 66 member 1 [Source:HGNC Symbol;Acc:HGNC:26001]                        |
| ENSG0000142611  | PRDM16  | PR/SET domain 16 [Source:HGNC Symbol;Acc:HGNC:14000]                                         |
| ENSG0000142611  | PRDM16  | PR/SET domain 16 [Source:HGNC Symbol;Acc:HGNC:14000]                                         |
| ENSG0000142611  | PRDM16  | PR/SET domain 16 [Source:HGNC Symbol;Acc:HGNC:14000]                                         |
| ENSG0000116731  | PRDM2   | PR/SET domain 2 [Source:HGNC Symbol;Acc:HGNC:9347]                                           |
| ENSG0000162409  | PRKAA2  | protein kinase AMP-activated catalytic subunit alpha 2 [Source:HGNC Symbol;Acc:HGNC:9377]    |
| ENSG0000142875  | PRKACB  | protein kinase cAMP-activated catalytic subunit beta [Source:HGNC Symbol;Acc:HGNC:9381]      |
| ENSG0000067606  | PRKCZ   | protein kinase C zeta [Source:HGNC Symbol;Acc:HGNC:9412]                                     |
| ENSG0000169403  | PTAFR   | platelet activating factor receptor [Source:HGNC Symbol;Acc:HGNC:9582]                       |
| ENSG0000117425  | PTCH2   | patched 2 [Source:HGNC Symbol;Acc:HGNC:9586]                                                 |
| None            | None    | None                                                                                         |

|                 |            |                                                                                               |
|-----------------|------------|-----------------------------------------------------------------------------------------------|
| None            | None       | None                                                                                          |
| ENSG00000134247 | PTGFRN     | prostaglandin F2 receptor inhibitor [Source:HGNC Symbol;Acc:HGNC:9601]                        |
| ENSG00000142949 | PTPRF      | protein tyrosine phosphatase receptor type F [Source:HGNC Symbol;Acc:HGNC:9670]               |
| ENSG00000142949 | PTPRF      | protein tyrosine phosphatase receptor type F [Source:HGNC Symbol;Acc:HGNC:9670]               |
| ENSG00000142949 | PTPRF      | protein tyrosine phosphatase receptor type F [Source:HGNC Symbol;Acc:HGNC:9670]               |
| ENSG00000142949 | PTPRF      | protein tyrosine phosphatase receptor type F [Source:HGNC Symbol;Acc:HGNC:9670]               |
| ENSG00000060656 | PTPRU      | protein tyrosine phosphatase receptor type U [Source:HGNC Symbol;Acc:HGNC:9683]               |
| ENSG00000169213 | RAB3B      | RAB3B, member RAS oncogene family [Source:HGNC Symbol;Acc:HGNC:9778]                          |
| ENSG00000169213 | RAB3B      | RAB3B, member RAS oncogene family [Source:HGNC Symbol;Acc:HGNC:9778]                          |
| ENSG00000169213 | RAB3B      | RAB3B, member RAS oncogene family [Source:HGNC Symbol;Acc:HGNC:9778]                          |
| ENSG00000116473 | RAP1A      | RAP1A, member of RAS oncogene family [Source:HGNC Symbol;Acc:HGNC:9855]                       |
| ENSG00000076864 | RAP1GAP    | RAP1 GTPase activating protein [Source:HGNC Symbol;Acc:HGNC:9858]                             |
| ENSG00000076864 | RAP1GAP    | RAP1 GTPase activating protein [Source:HGNC Symbol;Acc:HGNC:9858]                             |
| ENSG00000162521 | RBBP4      | RB binding protein 4, chromatin remodeling factor [Source:HGNC Symbol;Acc:HGNC:9887]          |
| ENSG00000134597 | RBMX2      | RNA binding motif protein X-linked 2 [Source:HGNC Symbol;Acc:HGNC:24282]                      |
| ENSG00000134193 | REG4       | regenerating family member 4 [Source:HGNC Symbol;Acc:HGNC:22977]                              |
| ENSG00000142599 | RERE       | arginine-glutamic acid dipeptide repeats [Source:HGNC Symbol;Acc:HGNC:9965]                   |
| ENSG00000142599 | RERE       | arginine-glutamic acid dipeptide repeats [Source:HGNC Symbol;Acc:HGNC:9965]                   |
| ENSG00000142599 | RERE       | arginine-glutamic acid dipeptide repeats [Source:HGNC Symbol;Acc:HGNC:9965]                   |
| ENSG00000142599 | RERE       | arginine-glutamic acid dipeptide repeats [Source:HGNC Symbol;Acc:HGNC:9965]                   |
| ENSG00000142599 | RERE       | arginine-glutamic acid dipeptide repeats [Source:HGNC Symbol;Acc:HGNC:9965]                   |
| ENSG00000142599 | RERE       | arginine-glutamic acid dipeptide repeats [Source:HGNC Symbol;Acc:HGNC:9965]                   |
| ENSG00000188672 | RHCE       | Rh blood group CcEe antigens [Source:HGNC Symbol;Acc:HGNC:10008]                              |
| ENSG00000117016 | RIMS3      | regulating synaptic membrane exocytosis 3 [Source:HGNC Symbol;Acc:HGNC:21292]                 |
| ENSG00000158286 | RNF207     | ring finger protein 207 [Source:HGNC Symbol;Acc:HGNC:32947]                                   |
| ENSG00000187147 | RNF220     | ring finger protein 220 [Source:HGNC Symbol;Acc:HGNC:25552]                                   |
| ENSG00000187147 | RNF220     | ring finger protein 220 [Source:HGNC Symbol;Acc:HGNC:25552]                                   |
| ENSG00000187147 | RNF220     | ring finger protein 220 [Source:HGNC Symbol;Acc:HGNC:25552]                                   |
| ENSG00000187147 | RNF220     | ring finger protein 220 [Source:HGNC Symbol;Acc:HGNC:25552]                                   |
| ENSG00000185483 | ROR1       | receptor tyrosine kinase like orphan receptor 1 [Source:HGNC Symbol;Acc:HGNC:10256]           |
| ENSG00000185483 | ROR1       | receptor tyrosine kinase like orphan receptor 1 [Source:HGNC Symbol;Acc:HGNC:10256]           |
| ENSG00000185483 | ROR1       | receptor tyrosine kinase like orphan receptor 1 [Source:HGNC Symbol;Acc:HGNC:10256]           |
| ENSG00000185483 | ROR1       | receptor tyrosine kinase like orphan receptor 1 [Source:HGNC Symbol;Acc:HGNC:10256]           |
| ENSG00000117676 | RPS6KA1    | ribosomal protein S6 kinase A1 [Source:HGNC Symbol;Acc:HGNC:10430]                            |
| ENSG00000137996 | RTCA       | RNA 3'-terminal phosphate cyclase [Source:HGNC Symbol;Acc:HGNC:17981]                         |
| ENSG00000020633 | RUNX3      | RUNX family transcription factor 3 [Source:HGNC Symbol;Acc:HGNC:10473]                        |
| ENSG00000116497 | S100PBP    | S100P binding protein [Source:HGNC Symbol;Acc:HGNC:25768]                                     |
| ENSG00000116497 | S100PBP    | S100P binding protein [Source:HGNC Symbol;Acc:HGNC:25768]                                     |
| ENSG00000187634 | SAMD11     | sterile alpha motif domain containing 11 [Source:HGNC Symbol;Acc:HGNC:28706]                  |
| ENSG00000156876 | SASS6      | SAS-6 centriolar assembly protein [Source:HGNC Symbol;Acc:HGNC:25403]                         |
| ENSG00000156876 | SASS6      | SAS-6 centriolar assembly protein [Source:HGNC Symbol;Acc:HGNC:25403]                         |
| ENSG00000119231 | SEN5       | SUMO specific peptidase 5 [Source:HGNC Symbol;Acc:HGNC:28407]                                 |
| ENSG00000168528 | SERINC2    | serine incorporator 2 [Source:HGNC Symbol;Acc:HGNC:23231]                                     |
| ENSG00000183431 | SF3A3      | splicing factor 3a subunit 3 [Source:HGNC Symbol;Acc:HGNC:10767]                              |
| ENSG00000118473 | SGIP1      | SH3GL interacting endocytic adaptor 1 [Source:HGNC Symbol;Acc:HGNC:25412]                     |
| None            | None       | None                                                                                          |
| ENSG00000162383 | SLC1A7     | solute carrier family 1 member 7 [Source:HGNC Symbol;Acc:HGNC:10945]                          |
| ENSG00000085491 | SLC25A24   | solute carrier family 25 member 24 [Source:HGNC Symbol;Acc:HGNC:20662]                        |
| ENSG00000142583 | SLC2A5     | solute carrier family 2 member 5 [Source:HGNC Symbol;Acc:HGNC:11010]                          |
| None            | None       | None                                                                                          |
| ENSG00000137968 | SLC44A5    | solute carrier family 44 member 5 [Source:HGNC Symbol;Acc:HGNC:28524]                         |
| ENSG00000137968 | SLC44A5    | solute carrier family 44 member 5 [Source:HGNC Symbol;Acc:HGNC:28524]                         |
| ENSG00000137968 | SLC44A5    | solute carrier family 44 member 5 [Source:HGNC Symbol;Acc:HGNC:28524]                         |
| ENSG00000117834 | SLC5A9     | solute carrier family 5 member 9 [Source:HGNC Symbol;Acc:HGNC:22146]                          |
| ENSG00000084070 | SMAP2      | small ArfGAP2 [Source:HGNC Symbol;Acc:HGNC:25082]                                             |
| ENSG00000084070 | SMAP2      | small ArfGAP2 [Source:HGNC Symbol;Acc:HGNC:25082]                                             |
| ENSG00000162627 | SNX7       | sorting nexin 7 [Source:HGNC Symbol;Acc:HGNC:14971]                                           |
| ENSG00000162627 | SNX7       | sorting nexin 7 [Source:HGNC Symbol;Acc:HGNC:14971]                                           |
| ENSG00000162627 | SNX7       | sorting nexin 7 [Source:HGNC Symbol;Acc:HGNC:14971]                                           |
| ENSG00000162627 | SNX7       | sorting nexin 7 [Source:HGNC Symbol;Acc:HGNC:14971]                                           |
| ENSG00000134243 | SORT1      | soritin 1 [Source:HGNC Symbol;Acc:HGNC:11186]                                                 |
| ENSG00000134243 | SORT1      | soritin 1 [Source:HGNC Symbol;Acc:HGNC:11186]                                                 |
| ENSG00000155761 | SPAG17     | sperm associated antigen 17 [Source:HGNC Symbol;Acc:HGNC:26620]                               |
| ENSG00000187144 | SPATA21    | spermatogenesis associated 21 [Source:HGNC Symbol;Acc:HGNC:28026]                             |
| ENSG00000132122 | SPATA6     | spermatogenesis associated 6 [Source:HGNC Symbol;Acc:HGNC:18309]                              |
| ENSG00000171621 | SPSB1      | splA/ryanodine receptor domain and SOCS box containing 1 [Source:HGNC Symbol;Acc:HGNC:30628]  |
| None            | None       | None                                                                                          |
| ENSG00000230806 | SRGAP2-AS1 | SRGAP2 antisense RNA 1 [Source:HGNC Symbol;Acc:HGNC:40902]                                    |
| ENSG00000230806 | SRGAP2-AS1 | SRGAP2 antisense RNA 1 [Source:HGNC Symbol;Acc:HGNC:40902]                                    |
| ENSG00000157216 | SSBP3      | single stranded DNA binding protein 3 [Source:HGNC Symbol;Acc:HGNC:15674]                     |
| ENSG00000157216 | SSBP3      | single stranded DNA binding protein 3 [Source:HGNC Symbol;Acc:HGNC:15674]                     |
| ENSG00000117155 | SSX2IP     | SSX family member 2 interacting protein [Source:HGNC Symbol;Acc:HGNC:16509]                   |
| ENSG00000184005 | ST6GALNAC3 | ST6 N-acetylgalactosaminide alpha-2,6-sialyltransferase 3 [Source:HGNC Symbol;Acc:HGNC:19343] |
| ENSG00000184005 | ST6GALNAC3 | ST6 N-acetylgalactosaminide alpha-2,6-sialyltransferase 3 [Source:HGNC Symbol;Acc:HGNC:19343] |
| ENSG00000184005 | ST6GALNAC3 | ST6 N-acetylgalactosaminide alpha-2,6-sialyltransferase 3 [Source:HGNC Symbol;Acc:HGNC:19343] |
| ENSG00000184005 | ST6GALNAC3 | ST6 N-acetylgalactosaminide alpha-2,6-sialyltransferase 3 [Source:HGNC Symbol;Acc:HGNC:19343] |
| ENSG00000184005 | ST6GALNAC3 | ST6 N-acetylgalactosaminide alpha-2,6-sialyltransferase 3 [Source:HGNC Symbol;Acc:HGNC:19343] |

|                 |            |                                                                                               |
|-----------------|------------|-----------------------------------------------------------------------------------------------|
| ENSG00000117069 | ST6GALNAC5 | ST6 N-acetylgalactosaminide alpha-2,6-sialyltransferase 5 [Source:HGNC Symbol;Acc:HGNC:19342] |
| ENSG00000123473 | STIL       | STIL centriolar assembly protein [Source:HGNC Symbol;Acc:HGNC:10879]                          |
| ENSG00000117632 | STMN1      | stathmin 1 [Source:HGNC Symbol;Acc:HGNC:6510]                                                 |
| ENSG00000116266 | STXBP3     | syntaxin binding protein 3 [Source:HGNC Symbol;Acc:HGNC:11446]                                |
| ENSG00000143028 | SYPL2      | synaptophysin like 2 [Source:HGNC Symbol;Acc:HGNC:27638]                                      |
| ENSG00000134207 | SYT6       | synaptotagmin 6 [Source:HGNC Symbol;Acc:HGNC:18638]                                           |
| ENSG00000134207 | SYT6       | synaptotagmin 6 [Source:HGNC Symbol;Acc:HGNC:18638]                                           |
| ENSG00000173662 | TAS1R1     | taste 1 receptor member 1 [Source:HGNC Symbol;Acc:HGNC:14448]                                 |
| ENSG00000179002 | TAS1R2     | taste 1 receptor member 2 [Source:HGNC Symbol;Acc:HGNC:14905]                                 |
| ENSG00000179002 | TAS1R2     | taste 1 receptor member 2 [Source:HGNC Symbol;Acc:HGNC:14905]                                 |
| ENSG00000092607 | TBX15      | T-box transcription factor 15 [Source:HGNC Symbol;Acc:HGNC:11594]                             |
| ENSG00000070759 | TESK2      | testis associated actin remodelling kinase 2 [Source:HGNC Symbol;Acc:HGNC:11732]              |
| ENSG00000069702 | TGFBR3     | transforming growth factor beta receptor 3 [Source:HGNC Symbol;Acc:HGNC:11774]                |
| ENSG00000069702 | TGFBR3     | transforming growth factor beta receptor 3 [Source:HGNC Symbol;Acc:HGNC:11774]                |
| ENSG00000069702 | TGFBR3     | transforming growth factor beta receptor 3 [Source:HGNC Symbol;Acc:HGNC:11774]                |
| ENSG00000054118 | THRAP3     | thyroid hormone receptor associated protein 3 [Source:HGNC Symbol;Acc:HGNC:22964]             |
| ENSG00000162542 | TMCO4      | transmembrane and coiled-coil domains 4 [Source:HGNC Symbol;Acc:HGNC:27393]                   |
| ENSG00000162542 | TMCO4      | transmembrane and coiled-coil domains 4 [Source:HGNC Symbol;Acc:HGNC:27393]                   |
| ENSG00000162542 | TMCO4      | transmembrane and coiled-coil domains 4 [Source:HGNC Symbol;Acc:HGNC:27393]                   |
| ENSG00000171729 | TMEM51     | transmembrane protein 51 [Source:HGNC Symbol;Acc:HGNC:25488]                                  |
| ENSG00000171729 | TMEM51     | transmembrane protein 51 [Source:HGNC Symbol;Acc:HGNC:25488]                                  |
| ENSG00000171729 | TMEM51     | transmembrane protein 51 [Source:HGNC Symbol;Acc:HGNC:25488]                                  |
| ENSG00000175147 | TMEM51-AS  | TMEM51 antisense RNA 1 [Source:HGNC Symbol;Acc:HGNC:26301]                                    |
| None            | None       | None                                                                                          |
| None            | None       | None                                                                                          |
| ENSG00000116209 | TMEM59     | transmembrane protein 59 [Source:HGNC Symbol;Acc:HGNC:1239]                                   |
| ENSG00000120949 | TNFRSF8    | TNF receptor superfamily member 8 [Source:HGNC Symbol;Acc:HGNC:11923]                         |
| ENSG00000078900 | TP73       | tumor protein p73 [Source:HGNC Symbol;Acc:HGNC:12003]                                         |
| ENSG00000269113 | TRABD2B    | TraB domain containing 2B [Source:HGNC Symbol;Acc:HGNC:44200]                                 |
| ENSG00000269113 | TRABD2B    | TraB domain containing 2B [Source:HGNC Symbol;Acc:HGNC:44200]                                 |
| ENSG00000197323 | TRIM33     | tripartite motif containing 33 [Source:HGNC Symbol;Acc:HGNC:16290]                            |
| ENSG00000197323 | TRIM33     | tripartite motif containing 33 [Source:HGNC Symbol;Acc:HGNC:16290]                            |
| ENSG00000116525 | TRIM62     | tripartite motif containing 62 [Source:HGNC Symbol;Acc:HGNC:25574]                            |
| ENSG00000043514 | TRIT1      | tRNA isopentenyltransferase 1 [Source:HGNC Symbol;Acc:HGNC:20286]                             |
| ENSG00000134198 | TSPAN2     | tetraspanin 2 [Source:HGNC Symbol;Acc:HGNC:20659]                                             |
| ENSG00000006555 | TTC22      | tetratricopeptide repeat domain 22 [Source:HGNC Symbol;Acc:HGNC:26067]                        |
| ENSG00000085831 | TTC39A     | tetratricopeptide repeat domain 39A [Source:HGNC Symbol;Acc:HGNC:18657]                       |
| ENSG00000159247 | TUBBP5     | tubulin beta pseudogene 5 [Source:HGNC Symbol;Acc:HGNC:23674]                                 |
| ENSG00000159247 | TUBBP5     | tubulin beta pseudogene 5 [Source:HGNC Symbol;Acc:HGNC:23674]                                 |
| ENSG00000158062 | UBXN11     | UBX domain protein 11 [Source:HGNC Symbol;Acc:HGNC:30600]                                     |
| ENSG00000158062 | UBXN11     | UBX domain protein 11 [Source:HGNC Symbol;Acc:HGNC:30600]                                     |
| ENSG00000162402 | USP24      | ubiquitin specific peptidase 24 [Source:HGNC Symbol;Acc:HGNC:12623]                           |
| ENSG00000162402 | USP24      | ubiquitin specific peptidase 24 [Source:HGNC Symbol;Acc:HGNC:12623]                           |
| ENSG00000090686 | USP48      | ubiquitin specific peptidase 48 [Source:HGNC Symbol;Acc:HGNC:18533]                           |
| ENSG00000134215 | VAV3       | vav guanine nucleotide exchange factor 3 [Source:HGNC Symbol;Acc:HGNC:12659]                  |
| ENSG00000134215 | VAV3       | vav guanine nucleotide exchange factor 3 [Source:HGNC Symbol;Acc:HGNC:12659]                  |
| ENSG00000134215 | VAV3       | vav guanine nucleotide exchange factor 3 [Source:HGNC Symbol;Acc:HGNC:12659]                  |
| ENSG00000134215 | VAV3       | vav guanine nucleotide exchange factor 3 [Source:HGNC Symbol;Acc:HGNC:12659]                  |
| ENSG00000230489 | VAV3-AS1   | VAV3 antisense RNA 1 [Source:HGNC Symbol;Acc:HGNC:40608]                                      |
| ENSG00000048707 | VPS13D     | vacuolar protein sorting 13 homolog D [Source:HGNC Symbol;Acc:HGNC:23595]                     |
| ENSG00000134258 | VTCN1      | V-set domain containing T cell activation inhibitor 1 [Source:HGNC Symbol;Acc:HGNC:28873]     |
| ENSG00000134258 | VTCN1      | V-set domain containing T cell activation inhibitor 1 [Source:HGNC Symbol;Acc:HGNC:28873]     |
| ENSG00000116874 | WARS2      | tryptophanyl tRNA synthetase 2, mitochondrial [Source:HGNC Symbol;Acc:HGNC:12730]             |
| ENSG00000158195 | WASF2      | WASP family member 2 [Source:HGNC Symbol;Acc:HGNC:12733]                                      |
| ENSG00000158195 | WASF2      | WASP family member 2 [Source:HGNC Symbol;Acc:HGNC:12733]                                      |
| ENSG00000185596 | WASH3P     | WASP family homolog 3, pseudogene [Source:HGNC Symbol;Acc:HGNC:24362]                         |
| ENSG00000162643 | WDR63      | WD repeat domain 63 [Source:HGNC Symbol;Acc:HGNC:30711]                                       |
| ENSG00000162643 | WDR63      | WD repeat domain 63 [Source:HGNC Symbol;Acc:HGNC:30711]                                       |
| None            | None       | None                                                                                          |
| ENSG00000152763 | WDR78      | WD repeat domain 78 [Source:HGNC Symbol;Acc:HGNC:26252]                                       |
| ENSG00000116809 | ZBTB17     | zinc finger and BTB domain containing 17 [Source:HGNC Symbol;Acc:HGNC:12936]                  |
| ENSG00000157077 | ZFYVE9     | zinc finger FYVE-type containing 9 [Source:HGNC Symbol;Acc:HGNC:6775]                         |
| ENSG00000157077 | ZFYVE9     | zinc finger FYVE-type containing 9 [Source:HGNC Symbol;Acc:HGNC:6775]                         |
| ENSG00000157077 | ZFYVE9     | zinc finger FYVE-type containing 9 [Source:HGNC Symbol;Acc:HGNC:6775]                         |
| ENSG00000066185 | ZMYND12    | zinc finger MYND-type containing 12 [Source:HGNC Symbol;Acc:HGNC:21192]                       |
| ENSG00000162664 | ZNF326     | zinc finger protein 326 [Source:HGNC Symbol;Acc:HGNC:14104]                                   |
| ENSG00000172748 | ZNF596     | zinc finger protein 596 [Source:HGNC Symbol;Acc:HGNC:27268]                                   |
| ENSG00000162415 | ZSWIM5     | zinc finger SWIM-type containing 5 [Source:HGNC Symbol;Acc:HGNC:29299]                        |
| ENSG00000162378 | ZYG11B     | zyg-11 family member B, cell cycle regulator [Source:HGNC Symbol;Acc:HGNC:25820]              |
| ENSG00000036549 | AC118549.1 | zinc finger ZZ-type containing 3 [Source:NCBI gene;Acc:26009]                                 |
| ENSG00000036549 | AC118549.1 | zinc finger ZZ-type containing 3 [Source:NCBI gene;Acc:26009]                                 |
