# Supplementary material for: Genetic Mutations Associated with Hormone-Positive Breast Cancer in Ethiopian Women
Source: bioRxiv or medRxiv preprint supplement (doi:10.1101/2020.11.25.20238881), 2020-11-30
Supplement: Supplementary file [file media-3.pdf]

| Ensembl_ID      | geneName  | description                                                                                  |
|-----------------|-----------|----------------------------------------------------------------------------------------------|
| ENSG00000118733 | OLFM3     | olfactomedin 3 [Source:HGNC Symbol;Acc:HGNC:17990]                                           |
| ENSG00000116874 | WARS2     | tryptophanyl tRNA synthetase 2, mitochondrial [Source:HGNC Symbol;Acc:HGNC:12730]            |
| ENSG00000172260 | NEGR1     | neuronal growth regulator 1 [Source:HGNC Symbol;Acc:HGNC:17302]                              |
| ENSG00000162598 | C1orf87   | chromosome 1 open reading frame 87 [Source:HGNC Symbol;Acc:HGNC:28547]                       |
| ENSG00000171680 | PLEKHG5   | pleckstrin homology and RhoGEF domain containing G5 [Source:HGNC Symbol;Acc:HGNC:29105]      |
| ENSG00000116473 | RAP1A     | RAP1A, member of RAS oncogene family [Source:HGNC Symbol;Acc:HGNC:9855]                      |
| ENSG00000162378 | ZYG11B    | zyg-11 family member B, cell cycle regulator [Source:HGNC Symbol;Acc:HGNC:25820]             |
| ENSG00000143079 | CTTNBP2NL | CTTNBP2 N-terminal like [Source:HGNC Symbol;Acc:HGNC:25330]                                  |
| ENSG00000153904 | DDAH1     | dimethylarginine dimethylaminohydrolase 1 [Source:HGNC Symbol;Acc:HGNC:2715]                 |
| ENSG00000117643 | MAN1C1    | mannosidase alpha class 1C member 1 [Source:HGNC Symbol;Acc:HGNC:19080]                      |
| ENSG00000116497 | S100BPB   | S100P binding protein [Source:HGNC Symbol;Acc:HGNC:25768]                                    |
| ENSG00000197429 | IPP       | intracisternal A particle-promoted polypeptide [Source:HGNC Symbol;Acc:HGNC:6108]            |
| ENSG0000016490  | CLCA1     | chloride channel accessory 1 [Source:HGNC Symbol;Acc:HGNC:2015]                              |
| ENSG00000134193 | REG4      | regenerating family member 4 [Source:HGNC Symbol;Acc:HGNC:22977]                             |
| ENSG00000142875 | PRKACB    | protein kinase cAMP-activated catalytic subunit beta [Source:HGNC Symbol;Acc:HGNC:9381]      |
| ENSG00000123472 | ATPAF1    | ATP synthase mitochondrial F1 complex assembly factor 1 [Source:HGNC Symbol;Acc:HGNC:18803]  |
| ENSG00000185104 | FAF1      | Fas associated factor 1 [Source:HGNC Symbol;Acc:HGNC:3578]                                   |
| ENSG00000117115 | PADI2     | peptidyl arginine deiminase 2 [Source:HGNC Symbol;Acc:HGNC:18341]                            |
| ENSG00000219073 | CELA3B    | chymotrypsin like elastase family member 3B [Source:HGNC Symbol;Acc:HGNC:15945]              |
| ENSG00000097021 | ACOT7     | acyl-CoA thioesterase 7 [Source:HGNC Symbol;Acc:HGNC:24157]                                  |
| ENSG00000203965 | EFCAB7    | EF-hand calcium binding domain 7 [Source:HGNC Symbol;Acc:HGNC:29379]                         |
| ENSG00000276747 | PADI6     | peptidyl arginine deiminase 6 [Source:HGNC Symbol;Acc:HGNC:20449]                            |
| ENSG00000043514 | TRIT1     | tRNA isopentenyltransferase 1 [Source:HGNC Symbol;Acc:HGNC:20286]                            |
| ENSG00000162434 | JAK1      | Janus kinase 1 [Source:HGNC Symbol;Acc:HGNC:6190]                                            |
| ENSG00000162594 | IL23R     | interleukin 23 receptor [Source:HGNC Symbol;Acc:HGNC:19100]                                  |
| ENSG00000136720 | HS6ST1    | heparan sulfate 6-O-sulfotransferase 1 [Source:HGNC Symbol;Acc:HGNC:5201]                    |
| ENSG00000118473 | SGIP1     | SH3 domain GRB2 like endophilin interacting protein 1 [Source:HGNC Symbol;Acc:HGNC:25412]    |
| ENSG00000157211 | CDCP2     | CUB domain containing protein 2 [Source:HGNC Symbol;Acc:HGNC:27297]                          |
| ENSG00000162664 | ZNF326    | zinc finger protein 326 [Source:HGNC Symbol;Acc:HGNC:14104]                                  |
| ENSG00000186094 | AGBL4     | ATP/GTP binding protein like 4 [Source:HGNC Symbol;Acc:HGNC:25892]                           |
| ENSG00000162482 | AKR7A3    | aldo-keto reductase family 7 member A3 [Source:HGNC Symbol;Acc:HGNC:390]                     |
| ENSG00000174574 | AKIRIN1   | akirin 1 [Source:HGNC Symbol;Acc:HGNC:25744]                                                 |
| ENSG00000134597 | RBMX2     | RNA binding motif protein X-linked 2 [Source:HGNC Symbol;Acc:HGNC:24282]                     |
| ENSG00000078900 | TP73      | tumor protein p73 [Source:HGNC Symbol;Acc:HGNC:12003]                                        |
| ENSG00000185436 | IFNLR1    | interferon lambda receptor 1 [Source:HGNC Symbol;Acc:HGNC:18584]                             |
| ENSG00000116209 | TMEM59    | transmembrane protein 59 [Source:HGNC Symbol;Acc:HGNC:1239]                                  |
| ENSG00000184454 | NCMAP     | non-compact myelin associated protein [Source:HGNC Symbol;Acc:HGNC:29332]                    |
| ENSG00000183347 | GBP6      | guanylate binding protein family member 6 [Source:HGNC Symbol;Acc:HGNC:25395]                |
| ENSG00000215704 | CELA2B    | chymotrypsin like elastase family member 2B [Source:HGNC Symbol;Acc:HGNC:29995]              |
| ENSG00000188976 | NOC2L     | NOC2 like nucleolar associated transcriptional repressor [Source:HGNC Symbol;Acc:HGNC:24517] |
| ENSG00000204138 | PHACTR4   | phosphatase and actin regulator 4 [Source:HGNC Symbol;Acc:HGNC:25793]                        |
| ENSG00000116525 | TRIM62    | tripartite motif containing 62 [Source:HGNC Symbol;Acc:HGNC:25574]                           |
| ENSG00000117640 | MTFR1L    | mitochondrial fission regulator 1 like [Source:HGNC Symbol;Acc:HGNC:28836]                   |
| ENSG00000142655 | PEX14     | peroxisomal biogenesis factor 14 [Source:HGNC Symbol;Acc:HGNC:8856]                          |
| ENSG00000036549 | None      | None                                                                                         |
| ENSG00000197323 | TRIM33    | tripartite motif containing 33 [Source:HGNC Symbol;Acc:HGNC:16290]                           |
| ENSG00000122483 | CCDC18    | coiled-coil domain containing 18 [Source:HGNC Symbol;Acc:HGNC:30370]                         |
| ENSG00000169598 | DFFB      | DNA fragmentation factor subunit beta [Source:HGNC Symbol;Acc:HGNC:2773]                     |
| ENSG00000004487 | KDM1A     | lysine demethylase 1A [Source:HGNC Symbol;Acc:HGNC:29079]                                    |
| ENSG00000125703 | ATG4C     | autophagy related 4C cysteine peptidase [Source:HGNC Symbol;Acc:HGNC:16040]                  |
| ENSG00000088280 | ASAP3     | ArfGAP with SH3 domain, ankyrin repeat and PH domain 3 [Source:HGNC Symbol;Acc:HGNC:14987]   |
| ENSG00000157077 | ZFYVE9    | zinc finger FYVE-type containing 9 [Source:HGNC Symbol;Acc:HGNC:6775]                        |
| ENSG00000090686 | USP48     | ubiquitin specific peptidase 48 [Source:HGNC Symbol;Acc:HGNC:18533]                          |
| ENSG00000142583 | SLC2A5    | solute carrier family 2 member 5 [Source:HGNC Symbol;Acc:HGNC:11010]                         |
| ENSG00000142794 | NBPF3     | NBPF member 3 [Source:HGNC Symbol;Acc:HGNC:25076]                                            |
| ENSG00000162390 | ACOT11    | acyl-CoA thioesterase 11 [Source:HGNC Symbol;Acc:HGNC:18156]                                 |
| ENSG00000188641 | DPYD      | dihydropyrimidine dehydrogenase [Source:HGNC Symbol;Acc:HGNC:3012]                           |
| ENSG00000086015 | MAST2     | microtubule associated serine/threonine kinase 2 [Source:HGNC Symbol;Acc:HGNC:19035]         |
| ENSG00000137960 | GIPC2     | GIPC PDZ domain containing family member 2 [Source:HGNC Symbol;Acc:HGNC:18177]               |
| ENSG00000020633 | RUNX3     | runt related transcription factor 3 [Source:HGNC Symbol;Acc:HGNC:10473]                      |

|                 |          |                                                                                              |
|-----------------|----------|----------------------------------------------------------------------------------------------|
| ENSG00000132854 | KANK4    | KN motif and ankyrin repeat domains 4 [Source:HGNC Symbol;Acc:HGNC:27263]                    |
| ENSG00000137996 | RTCA     | RNA 3'-terminal phosphate cyclase [Source:HGNC Symbol;Acc:HGNC:17981]                        |
| ENSG00000153898 | MCOLN2   | mucolipin 2 [Source:HGNC Symbol;Acc:HGNC:13357]                                              |
| ENSG00000085831 | TTC39A   | tetratricopeptide repeat domain 39A [Source:HGNC Symbol;Acc:HGNC:18657]                      |
| ENSG00000187634 | SAMD11   | sterile alpha motif domain containing 11 [Source:HGNC Symbol;Acc:HGNC:28706]                 |
| ENSG00000070785 | EIF2B3   | eukaryotic translation initiation factor 2B subunit gamma [Source:HGNC Symbol;Acc:HGNC:3259] |
| ENSG00000040487 | PQLC2    | PQ loop repeat containing 2 [Source:HGNC Symbol;Acc:HGNC:26001]                              |
| ENSG00000171729 | TMEM51   | transmembrane protein 51 [Source:HGNC Symbol;Acc:HGNC:25488]                                 |
| ENSG00000116809 | ZBTB17   | zinc finger and BTB domain containing 17 [Source:HGNC Symbol;Acc:HGNC:12936]                 |
| ENSG00000119231 | SENP5    | SUMO specific peptidase 5 [Source:HGNC Symbol;Acc:HGNC:28407]                                |
| ENSG00000116641 | DOCK7    | dedicator of cytokinesis 7 [Source:HGNC Symbol;Acc:HGNC:19190]                               |
| ENSG00000197312 | DDI2     | DNA damage inducible 1 homolog 2 [Source:HGNC Symbol;Acc:HGNC:24578]                         |
| ENSG00000066136 | NFYC     | nuclear transcription factor Y subunit gamma [Source:HGNC Symbol;Acc:HGNC:7806]              |
| ENSG00000172456 | FGGY     | FGGY carbohydrate kinase domain containing [Source:HGNC Symbol;Acc:HGNC:25610]               |
| ENSG00000078369 | GNB1     | G protein subunit beta 1 [Source:HGNC Symbol;Acc:HGNC:4396]                                  |
| ENSG00000085491 | SLC25A24 | solute carrier family 25 member 24 [Source:HGNC Symbol;Acc:HGNC:20662]                       |
| ENSG00000009709 | PAX7     | paired box 7 [Source:HGNC Symbol;Acc:HGNC:8621]                                              |
| ENSG00000158195 | WASF2    | WAS protein family member 2 [Source:HGNC Symbol;Acc:HGNC:12733]                              |
| ENSG00000116793 | PHTF1    | putative homeodomain transcription factor 1 [Source:HGNC Symbol;Acc:HGNC:8939]               |
| ENSG00000154027 | AK5      | adenylate kinase 5 [Source:HGNC Symbol;Acc:HGNC:365]                                         |
| ENSG00000162433 | AK4      | adenylate kinase 4 [Source:HGNC Symbol;Acc:HGNC:363]                                         |
| ENSG00000130762 | ARHGEF16 | Rho guanine nucleotide exchange factor 16 [Source:HGNC Symbol;Acc:HGNC:15515]                |
| ENSG00000132122 | SPATA6   | spermatogenesis associated 6 [Source:HGNC Symbol;Acc:HGNC:18309]                             |
| ENSG00000169213 | RAB3B    | RAB3B, member RAS oncogene family [Source:HGNC Symbol;Acc:HGNC:9778]                         |
| ENSG00000117419 | ERI3     | ERI1 exoribonuclease family member 3 [Source:HGNC Symbol;Acc:HGNC:17276]                     |
| ENSG00000143028 | SYPL2    | synaptophysin like 2 [Source:HGNC Symbol;Acc:HGNC:27638]                                     |
| ENSG00000123473 | STIL     | STIL, centriolar assembly protein [Source:HGNC Symbol;Acc:HGNC:10879]                        |
| ENSG00000116151 | MORN1    | MORN repeat containing 1 [Source:HGNC Symbol;Acc:HGNC:25852]                                 |
| ENSG00000172748 | ZNF596   | zinc finger protein 596 [Source:HGNC Symbol;Acc:HGNC:27268]                                  |
| ENSG00000162494 | LRRC38   | leucine rich repeat containing 38 [Source:HGNC Symbol;Acc:HGNC:27005]                        |
| ENSG00000169403 | PTAFR    | platelet activating factor receptor [Source:HGNC Symbol;Acc:HGNC:9582]                       |
| ENSG00000174332 | GLIS1    | GLIS family zinc finger 1 [Source:HGNC Symbol;Acc:HGNC:29525]                                |
| ENSG00000159592 | GPBP1L1  | GC-rich promoter binding protein 1 like 1 [Source:HGNC Symbol;Acc:HGNC:28843]                |
| ENSG00000001461 | NIPAL3   | NIPA like domain containing 3 [Source:HGNC Symbol;Acc:HGNC:25233]                            |
| ENSG00000172380 | GNG12    | G protein subunit gamma 12 [Source:HGNC Symbol;Acc:HGNC:19663]                               |
| ENSG00000049246 | PER3     | period circadian regulator 3 [Source:HGNC Symbol;Acc:HGNC:8847]                              |
| ENSG00000158062 | UBXN11   | UBX domain protein 11 [Source:HGNC Symbol;Acc:HGNC:30600]                                    |
| ENSG00000116266 | STXBP3   | syntaxin binding protein 3 [Source:HGNC Symbol;Acc:HGNC:11446]                               |
| ENSG00000117155 | SSX2IP   | SSX family member 2 interacting protein [Source:HGNC Symbol;Acc:HGNC:16509]                  |
| ENSG00000162631 | NTNG1    | netrin G1 [Source:HGNC Symbol;Acc:HGNC:23319]                                                |
| ENSG00000163873 | GRIK3    | glutamate ionotropic receptor kainate type subunit 3 [Source:HGNC Symbol;Acc:HGNC:4581]      |
| ENSG00000117054 | ACADM    | acyl-CoA dehydrogenase medium chain [Source:HGNC Symbol;Acc:HGNC:89]                         |
| ENSG00000157193 | LRP8     | LDL receptor related protein 8 [Source:HGNC Symbol;Acc:HGNC:6700]                            |
